# Supplementary material
Source: PubMed Central journal article supplement (PMC6380484)
Supplement: NIHMS1518018-supplement-2.pdf [file NIHMS1518018-supplement-2.pdf]

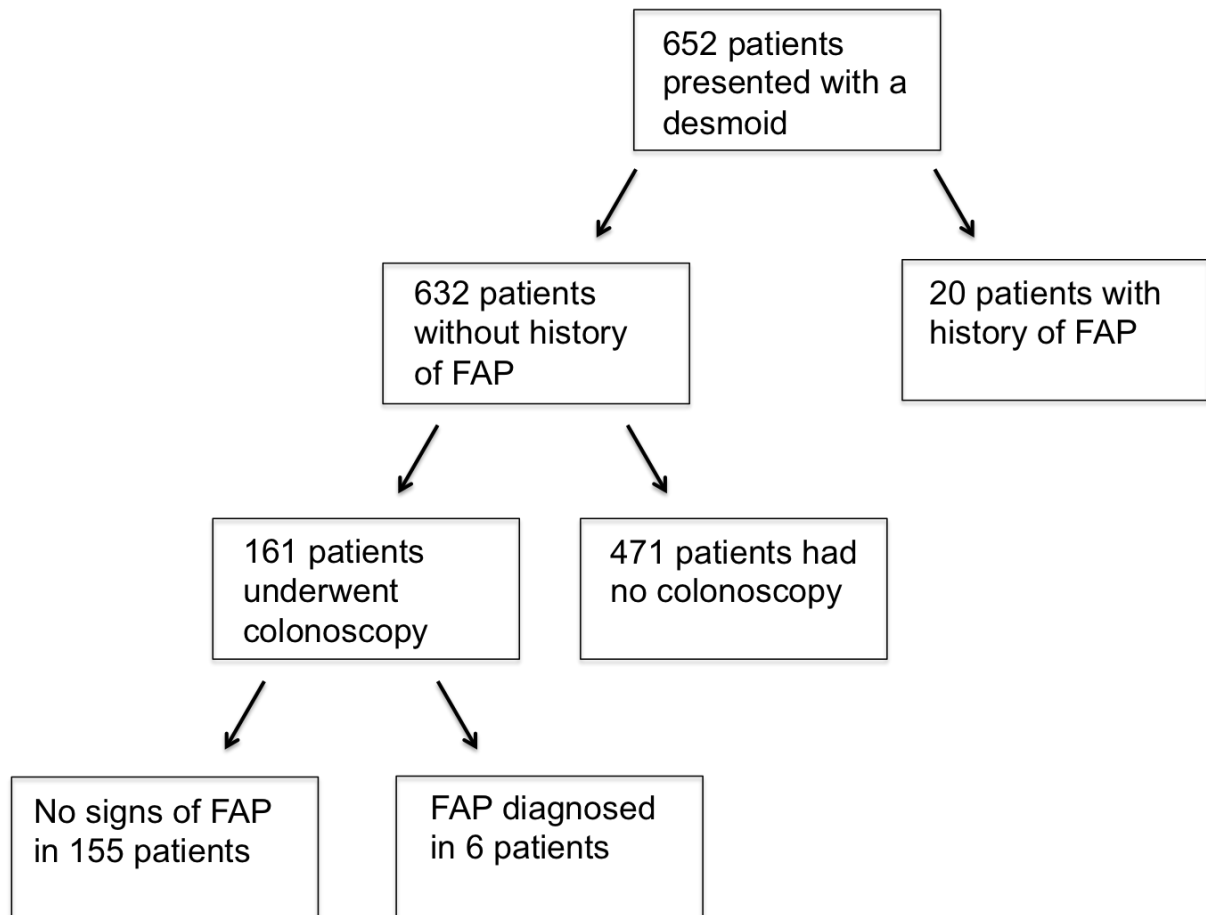

Supplemental Figure 1. Flow diagram describing cohort of patients selected for colonoscopy and those ultimately receiving a new diagnosis of familial adenomatous polyposis (FAP).
